# Supplementary material
Source: publisher site journal article supplement (https://www.kjim.org/upload/media/kjim-2021-475-suppl4.pdf)
Supplement: Supplementary file 1 [file kjim-2021-475-suppl4.pdf]

**Supplementary Table 4. Caregiver reliance (patient reported)**

| Variable                                        | MF (n = 39)   | PV (n = 25)   | ET (n = 41) | All (n = 105) | p value |
|-------------------------------------------------|---------------|---------------|-------------|---------------|---------|
| Caregiver reliance                              |               |               |             |               |         |
| Never                                           | 26 (68.42)    | 21 (87.50)    | 36 (87.80)  | 83 (80.58)    | 0.2297  |
| Rarely                                          | 6 (15.79)     | 2 (8.33)      | 4 (9.76)    | 12 (11.65)    |         |
| Sometimes                                       | 2 (5.26)      | 0             | 1 (2.44)    | 3 (2.91)      |         |
| Often                                           | 4 (10.53)     | 1 (4.17)      | 0           | 5 (4.85)      |         |
| Total                                           | 38 (97.44)    | 24 (96.00)    | 41 (100.00) | 103 (98.10)   |         |
| Primary caregiver                               |               |               |             |               |         |
| Spouse/partner                                  | 6 (60.00)     | 2 (66.67)     | 3 (60.00)   | 11 (61.11)    | 0.8869  |
| Son/daughter                                    | 3 (30.00)     | 1 (33.33)     | 1 (20.00)   | 5 (27.78)     |         |
| Other relative                                  | 0             | 0             | 1 (20.00)   | 1 (5.56)      |         |
| Paid nurse or home healthcare professional      | 1 (10.00)     | 0             | 0           | 1 (5.56)      |         |
| Total                                           | 10 (83.33)    | 3 (100.00)    | 5 (100.00)  | 18 (90.00)    |         |
| What kind of help do you require?               |               |               |             |               |         |
| Companionship                                   | 6 (50.00)     | 2 (66.67)     | 0           | 8 (40.00)     | 0.1250  |
| Transportation                                  | 9 (75.00)     | 3 (100.00)    | 3 (60.00)   | 15 (75.00)    | 0.6275  |
| Homemaking                                      | 8 (66.67)     | 1 (33.33)     | 3 (60.00)   | 12 (60.00)    | 0.8114  |
| Personal care assistance                        | 4 (33.33)     | 0             | 0           | 4 (20.00)     | 0.2962  |
| Healthcare assistance                           | 2 (16.67)     | 1 (33.33)     | 0           | 3 (15.00)     | 0.5175  |
| Managing finances                               | 4 (33.33)     | 1 (33.33)     | 0           | 5 (25.00)     | 0.3579  |
| Help plan and organize everyday activities      | 4 (33.33)     | 1 (33.33)     | 0           | 5 (25.00)     | 0.3579  |
| Hours received help                             | 17.68 ± 21.05 | 15.67 ± 12.90 | 6.60 ± 4.77 | 14.45 ± 17.13 | 0.5057  |
| Caregiver employment status, yes                | 5 (45.45)     | 1 (33.33)     | 0           | 6 (33.33)     | 0.3138  |
| Caregiver status                                |               |               |             |               |         |
| Changed from full-time to part-time employment? | 1 (11.11)     | 0             | 0           | 1 (5.88)      | 1.0000  |
| Taken early retirement?                         | 2 (22.22)     | 0             | 0           | 2 (11.76)     | 0.6691  |
| Voluntarily terminated his/her job?             | 3 (33.33)     | 2 (66.67)     | 0           | 5 (29.41)     | 0.0905  |
| Considered terminating his/her job              | 1 (11.11)     | 1 (33.33)     | 0           | 2 (11.76)     | 0.4044  |

Values are presented as number (%) or mean ± standard deviation.

MF, myelofibrosis; PV, polycythemia vera; ET, essential thrombocythemia.
